# Supplementary material for: An immobilised Co(ii) and Ni(ii) Schiff base magnetic nanocatalyst via a click reaction: a greener approach for alcohol oxidation
Source: Royal Society of Chemistry journal article supplement (doi:10.1039/c5nj00218d), 2015-01-01
Supplement: c5nj00218d1.pdf [file c5nj00218d1.pdf]

## Immobilised Co(II) and Ni(II) Schiff base magnetic nanocatalyst via click reaction: Greener approach for alcohol oxidation.

Pooja. B. Bhat,<sup>a</sup> and Badekai Ramachandra Bhat<sup>b</sup>,

*Catalysis and Materials Chemistry Laboratory, Department of Chemistry,  
National Institute of Technology Karnataka, Surathkal, Srinivasanagar-575025, India*

*brchandra@gmail.com*

### 1.1 Synthesis of ligands (L1 &L2)

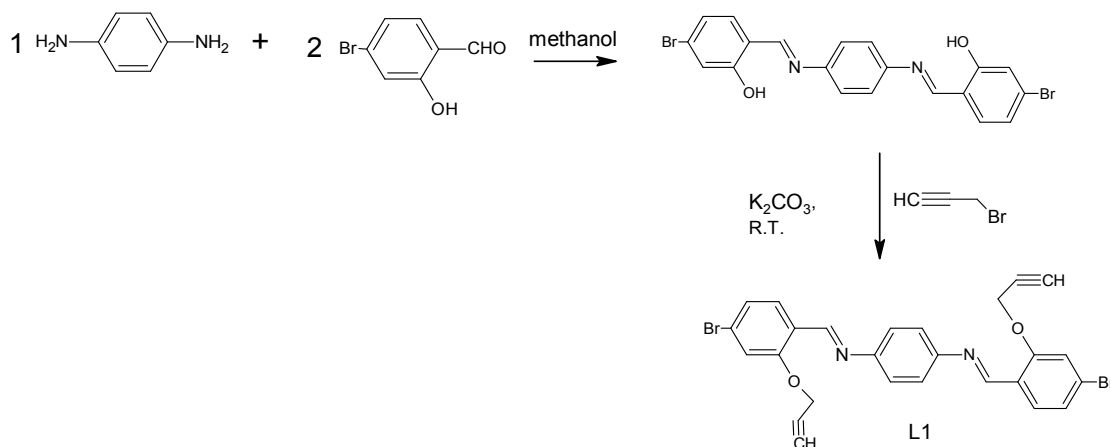

Synthesis of ligand N, N'-bis-(4 bromo 2-propynoxybenzylidene)-1,4 phenylenediamine (L1)

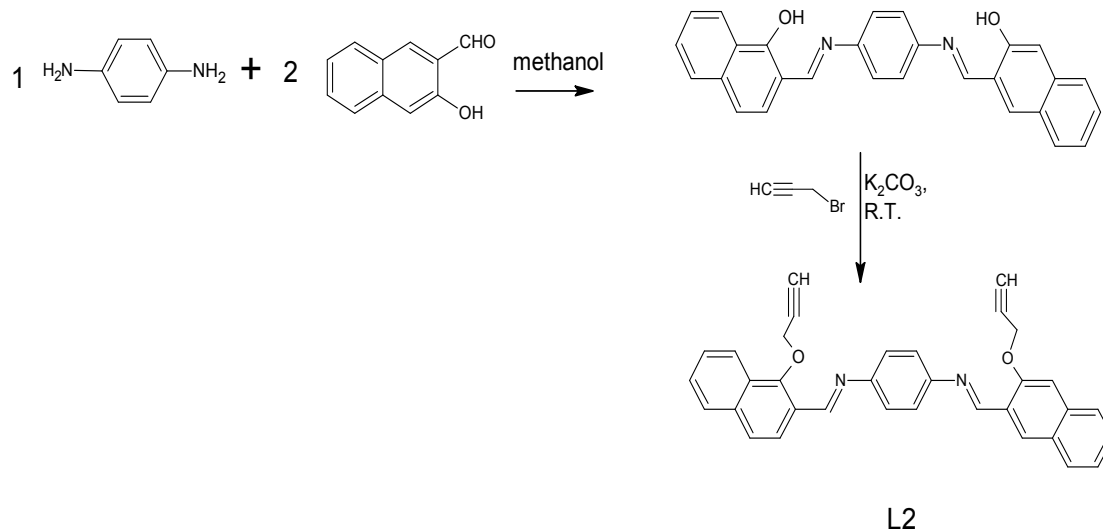

Synthesis of ligand N, N'-bis-(2-propynoxynaphthalidine)-1,4 phenylenediamine (L2)

### 1.2 Synthesis of complexes

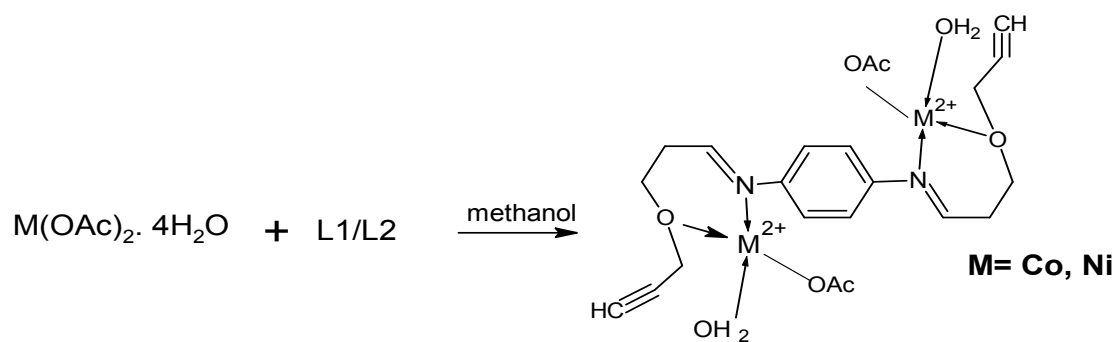

Synthesis of metal complexes

### 1.3 <sup>1</sup>HNMR of Ligand L1& L2

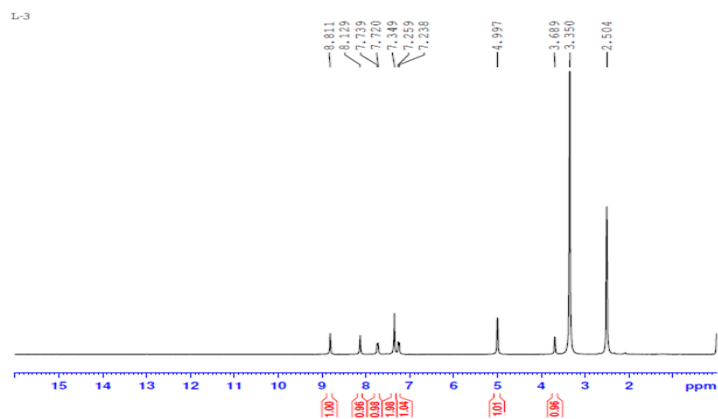

<sup>1</sup>HNMR of ligand N, N'-bis-(4 bromo 2-propynoxybenzylidene)-1,4 phenyldiamine

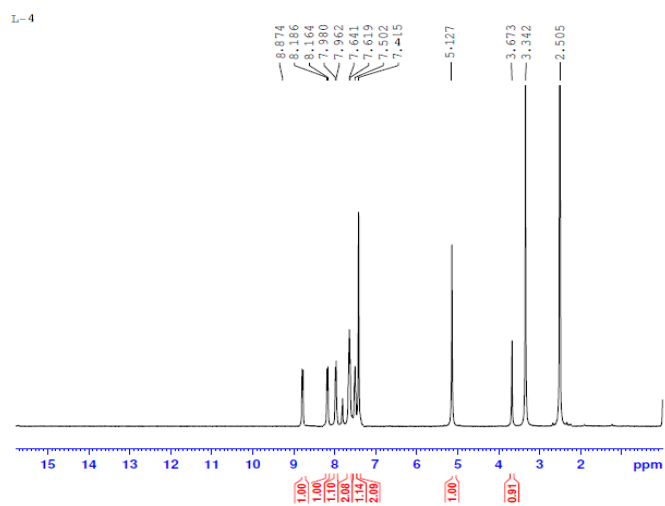

Fig S1. <sup>1</sup>HNMR of ligand N, N'-bis-(2-propynoxynaphthalidene)-1,4 phenyldiamine

## 1.4 FTIR of immobilized complexes

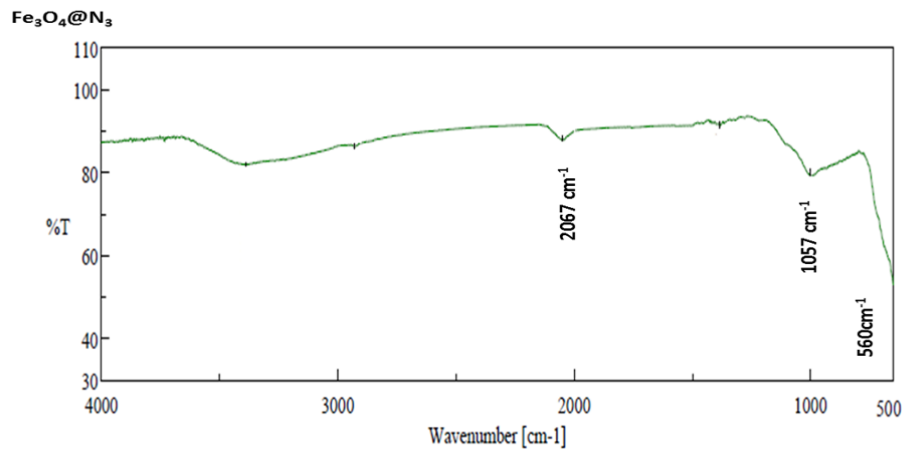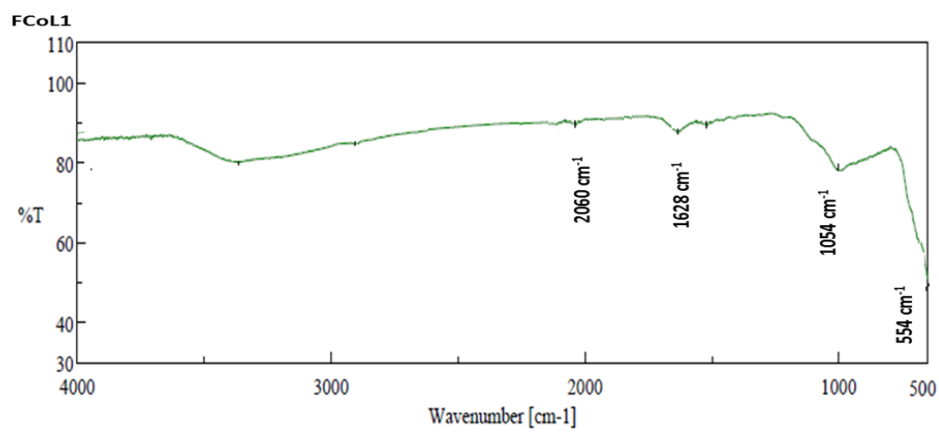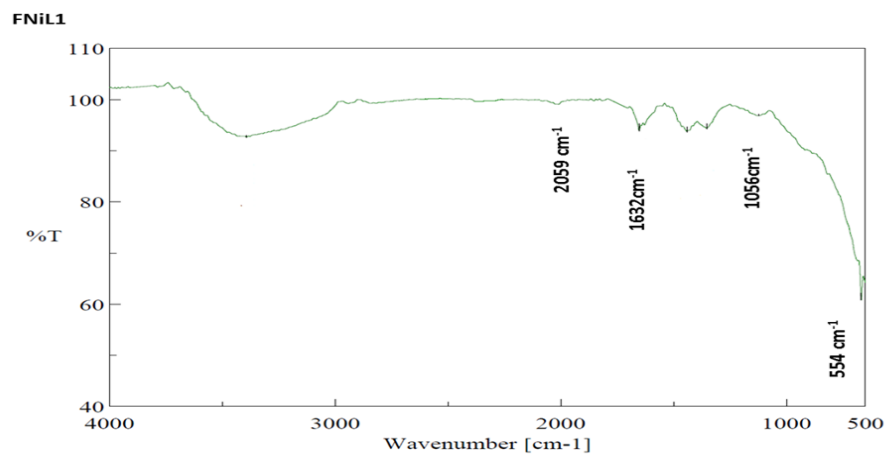

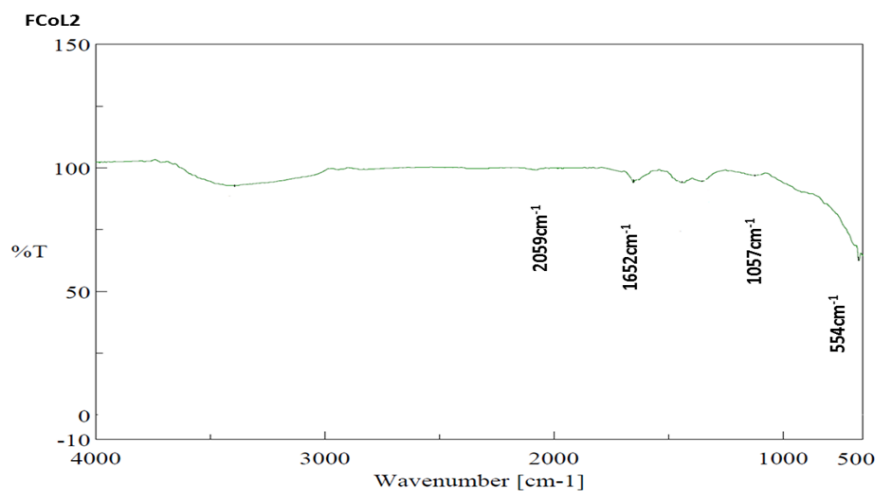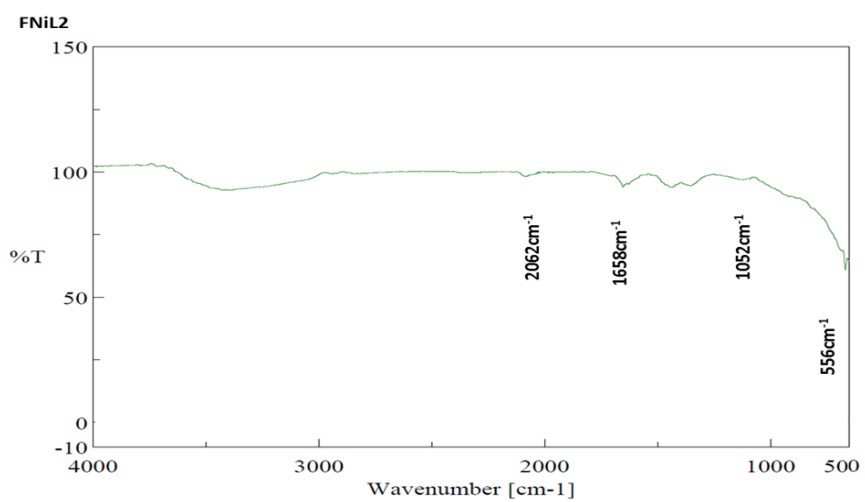

Fig S2 FTIR of immobilized complexes via click reaction

## 1.5 EDXA of immobilized complexes

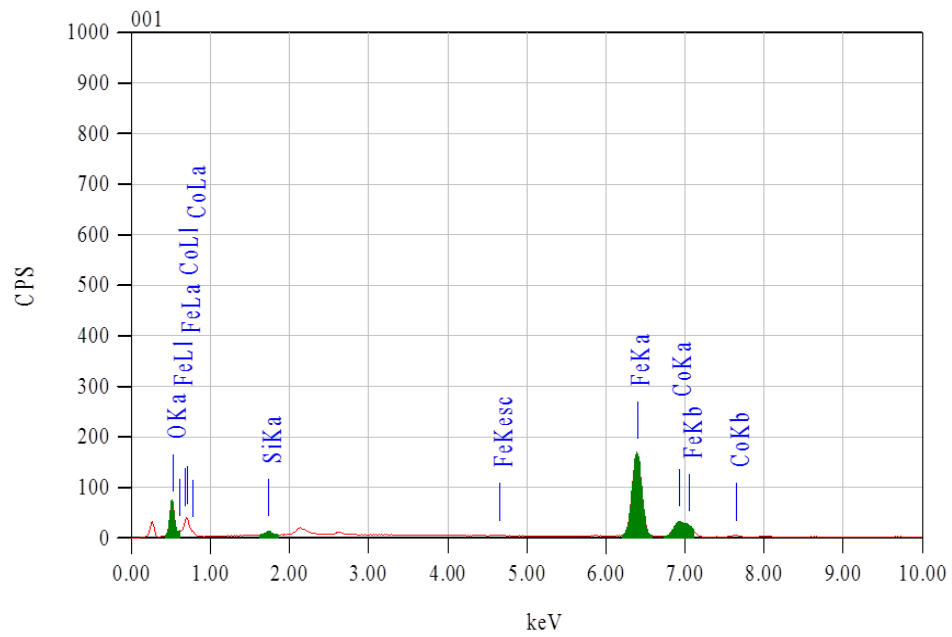

EDXA of FCoL1

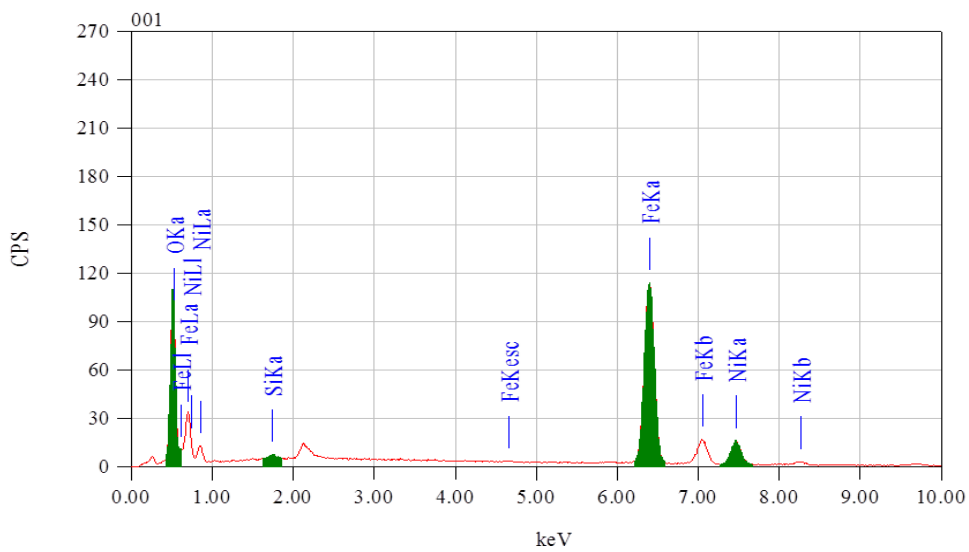

Fig S3 EDXA of FNiL1

## 1.6 Reusability of the catalyst

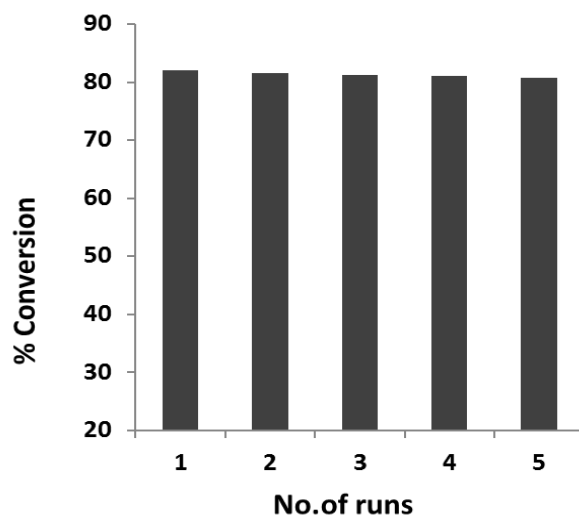

Catalyst reusability of FCoL1

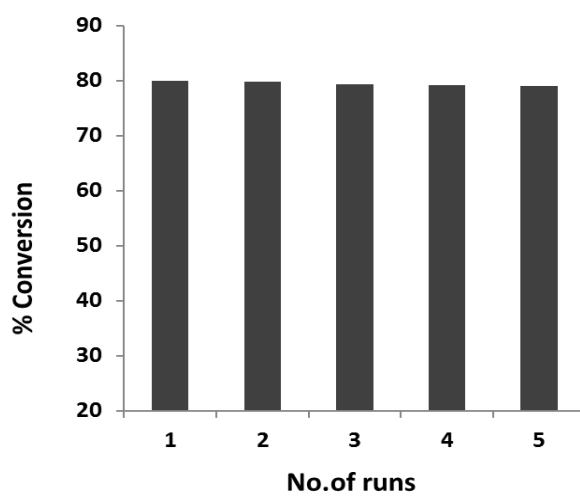

Catalyst reusability of FCoL2

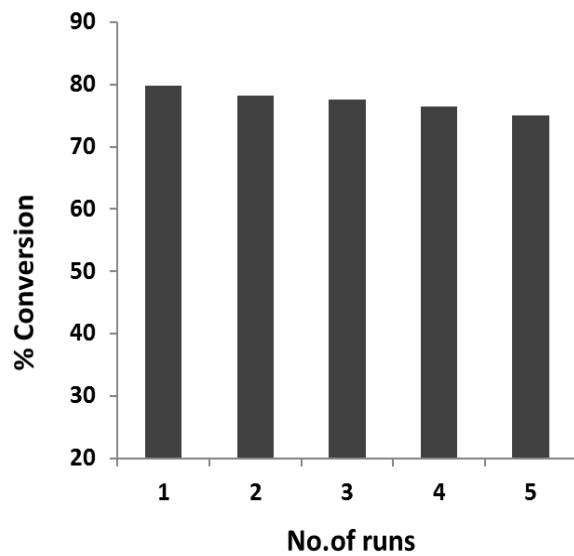

Catalyst reusability of FNiL1

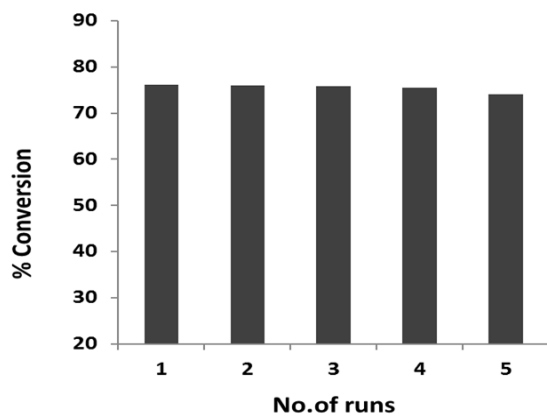

Fig S4 Catalyst reusability of FNiL2



Table S1. Amount of metal content in the leached nanocatalyst

| <b>Catalyst</b> | <b>w% metal as determined by AAS</b> |
|-----------------|--------------------------------------|
| <b>FCoL1</b>    | <b>0.06</b>                          |
| <b>FCoL2</b>    | <b>0.07</b>                          |
| <b>FNiL1</b>    | <b>0.09</b>                          |
| <b>FNiL2</b>    | <b>0.05</b>                          |
